# Supplementary material for: From monomer to micelle: a facile approach to the multi-step synthesis of block copolymers via inline purification
Source: Royal Society of Chemistry journal article supplement (doi:10.1039/d3sc01819a), 2023-01-01
Supplement: d3sc01819a1.pdf [file d3sc01819a1.pdf]

## Supporting information

# From monomer to micelle: A facile approach in the multi-step synthesis of block copolymers via inline purification

Pieter-Jan Voorter<sup>ab</sup>, Gayathri Dev<sup>ac</sup>, Axel-Laurenz Buckinx<sup>ad</sup>, Jinhuo Dai<sup>d</sup>, Priya Subramanian<sup>d</sup>, Anil Kumar<sup>c</sup>, Neil R. Cameron<sup>be</sup>, Tanja Junkers<sup>a</sup>

<sup>a</sup> School of Chemistry, Monash University, Victoria, Australia. <sup>b</sup> Department of Materials Science and Engineering, Monash University, Victoria, Australia. <sup>c</sup> Department of Chemistry, Indian Institute of Technology Bombay, Mumbai 400076, India, <sup>d</sup> Dulux Australia, Victoria, Australia, <sup>e</sup> School of Engineering, Warwick University, Coventry CV4 7AL, U.K.

# Contents

|                                                                         |           |
|-------------------------------------------------------------------------|-----------|
| <b>Materials .....</b>                                                  | <b>3</b>  |
| <b>Chemicals .....</b>                                                  | <b>3</b>  |
| <b>Reactor Setup .....</b>                                              | <b>4</b>  |
| <b>Characterization.....</b>                                            | <b>6</b>  |
| <b>Dialysis block design.....</b>                                       | <b>8</b>  |
| <b>Reactor Setup.....</b>                                               | <b>9</b>  |
| <b>Polymerization procedures .....</b>                                  | <b>11</b> |
| <b>Butyl acrylate (first block) .....</b>                               | <b>11</b> |
| Experimental procedure. ....                                            | 11        |
| <b>Methyl methacrylate (first block) .....</b>                          | <b>11</b> |
| The tubular reactor setup .....                                         | 11        |
| Experimental procedure. ....                                            | 12        |
| <b>Poly(ethylene glycol) methyl ether acrylate (second block) .....</b> | <b>13</b> |
| <b>Block copolymer analysis.....</b>                                    | <b>17</b> |
| <b>Dialysis setup - kinetics.....</b>                                   | <b>20</b> |
| <b>References.....</b>                                                  | <b>22</b> |

# Materials

## Chemicals

The monomers methyl methacrylate (MMA, 99% Merck), butyl acrylate (BA, 99% Merck) and poly(ethylene glycol) methyl ether acrylate (PEGMEA,  $M_n$  480, Sigma-Aldrich) were deinhibited over a column of activated basic alumina before use. 2-(Dodecylthiocarbonothioylthio)propionic acid (DOPAT) was synthesized according to the literature.[1] The reagents and chemicals used to synthesize DOPAT were purchased from Sigma Aldrich or VWR. 4-Cyano-4-[(dodecylsulfanylthiocarbonyl)sulfanyl]pentanoic acid (CDP-TTC, 97% Boron Molecular) was used as received. 1,1'-azobis(isobutyronitrile) (AIBN, 98% Sigma-Aldrich) was recrystallized twice from methanol before use. Dimethyl sulfoxide (DMSO, Merck) and 2-butanol (Sigma-Aldrich) were used as received.

## Reactor Setup

A Gastight syringe (100MR-LL-GT 10ML, SGE) and syringe pumps (Fusion 100, Chemyx) were used to feed the reactor mixture to the flow reactor. PFA tubing (1/16" x 0.5 mm ID) was used for all flow segments of the setup. A peristaltic pump (SF-10, Vapourtec) is placed in the dialysis loop and regulates the flow during the dialysis. The solvent flow into the dialysis block was controlled by an HPLC pump (Knauer Azura P 2.1S). A 6-port switch valve (VICI VALCO EUDA-C6W) managed the switch from polymerization to purification and vice versa.

|                                                                                     |             |                                                                              |
|-------------------------------------------------------------------------------------|-------------|------------------------------------------------------------------------------|
|    | IDEX XP-230 | Flangeless Fitting Natural, PEEK, 1/4- 28 Flat-Bottom, for 1/16" OD          |
|   | IDEX F-120  | One-Piece Fingertight 10-32 Coned, for 1/16" OD Natural                      |
|  | IDEX P-628  | Luer Adapter Female Luer x Female 1/4-28 Flat Bottom, Tefzel™ (ETFE) Natural |
|  | IDEX P-702  | Union Assembly PEEK .020 thru-hole, for 1/16" OD"                            |

|                                                                                    |                   |                                                  |
|------------------------------------------------------------------------------------|-------------------|--------------------------------------------------|
|   | <p>IDEX P-512</p> | <p>Y Assembly PEEK 1/4-28 .020in</p>             |
|   | <p>IDEX U-466</p> | <p>High Pressure Mixing Tee UHMWPE Frit 10um</p> |
|  | <p>CV-3340</p>    | <p>Check Valve Inline Non-Metallic 10-32</p>     |

**Table S1:** Overview of flow parts used in the setup

# Characterization

Inline NMR reaction monitoring was accomplished by recording  $^1\text{H}$  spectra (acquisition bandwidth 5 kHz; 83 ppm; 90 pulse width: 7 microseconds; dwell time: 200 microseconds; time: 6.554 seconds; repetition time: 60 seconds) using a low field benchtop 60 MHz NMR (Magritek, Spinsolve 1.19.0). A Powershim (40 min) was performed before the dialysis. The reaction monitor protocol (RMX) was used for data acquisition. All spectra were auto-phased in the Spinsolve software before analysis.

PSS SECcurity2 GPC systems operated by PSS WinGPC software, equipped with an SDV 5.0  $\mu\text{m}$  guard column (50 x 8 mm), followed by three SDV analytical 5.0  $\mu\text{m}$  columns with varying porosity (1000 Å, 100000 Å, and 1000000 Å) (50 x 8 mm) and a differential refractive index three detectors using THF as the eluent at 40 °C with a flow rate of 1 mL·min<sup>-1</sup>. The GPC system was calibrated using linear narrow polystyrene standards from PSS Laboratories ranging from 682 to 2.52 x 10<sup>6</sup> g·mol<sup>-1</sup> PS ( $K = 14.1 \times 10^{-5} \text{ dL}\cdot\text{g}^{-1}$  and  $\alpha = 0.70$ ). Molar masses of the PMMA samples were determined by universal calibration using Mark-Houwink-Sakurada (MHS) parameters for PMMA reported literature values ( $K = 12.9 \times 10^{-5} \text{ dL}\cdot\text{g}^{-1}$  and  $\alpha = 0.68$ ).

DLS was used to measure the hydrodynamic diameter. The particle size of the micelles was analyzed by DLS using the Litesizer™ 500 under the following conditions (Sidescatter at wavelength 658 nm, particle absorption coefficient 0.01, particle refractive index 1.5850, water refractive index 1.33). To measure the particle size, a volume of 2 ml of the block copolymer solution in deionized water (DI H<sub>2</sub>O) was placed in a polystyrene cuvette and measured at 25°C.

Electrospray ionization mass spectrometry (ESI-MS): ESI-MS Analysis was carried out at the Monash Analytical Platform, Australia (School of Chemistry, Monash University). From each sample 1 mg was dissolved in 1 mL THF (THF, HPLC grade). The THF solution was diluted ( $\pm 100$  times) by adding 1 drop to a 1 mL mixture of THF:methanol (MeOH) (THF:MeOH = 3:2 v/v). This mixture was infused via a Kd Scientific infusion pump at a static flow rate of 300 mL/h into the MS. The MS setup was as follows: Agilent 6220 time-of-flight mass spectrometry (Q-TOF MS) system (Santa Clara, CA, USA). The MS was operated in positive mode using the

following conditions: nebulizer pressure 35 psi, gas flowrate 8 L·min<sup>-1</sup>, gas temperature 300 °C, vaporizer temperature 250 °C, capillary voltage 250 V, fragmentor 150 V and skimmer 65 V. Instrument was operated in the extended dynamic range mode with data collected in m/z range 200–3000. Spectra were recorded over a 1-minute time period with 1 scan/s and subsequently averaged out before analysis. Spectra were analysed with Agilent Masshunter Qualitative Analysis B.07.00.

# Dialysis block design

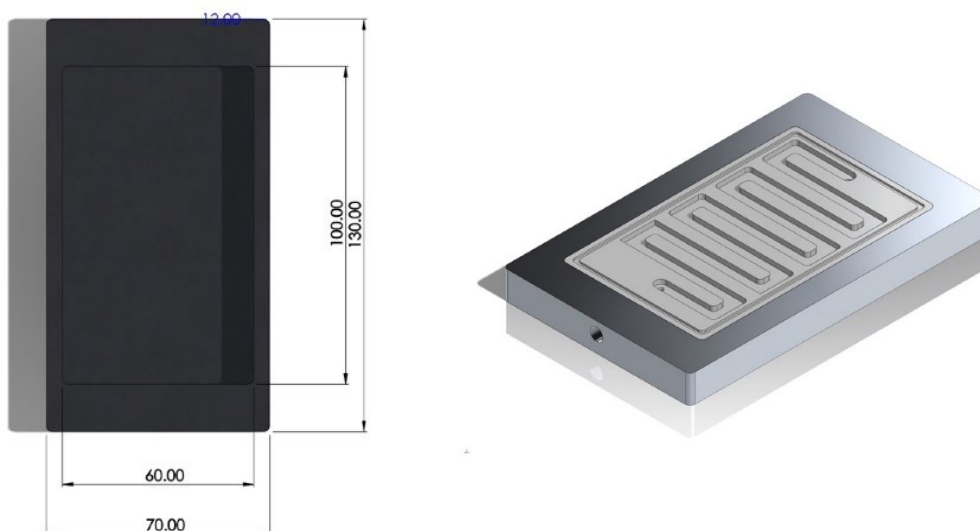

**Figure S1:** Schematic representation of the dialysis block.

Flat-bottom connectors can be connected to the inlet and outlet of the dialysis block. The channels are very shallow, 1mm in depth. This enhances the contact area between the polymer mixture and the solvent and, therefore, the rate of dialysis. The zig-zag structure enhances the turbulence in the reaction solution. This is important to promote the contact area even further. The monomer that crosses over the membrane will leave a void. Mixing the polymer mixture is essential to fill this void with more monomers close to the membrane to promote dialysis.



# Reactor Setup

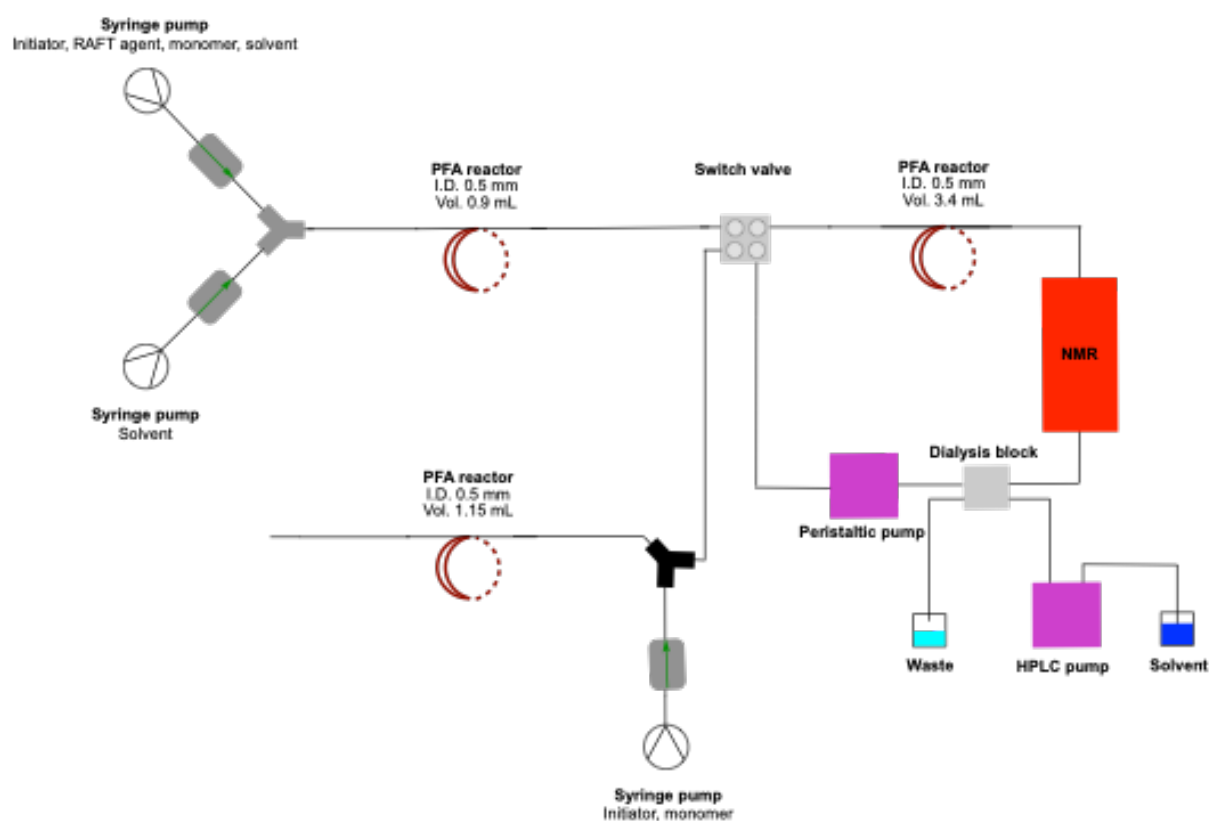

**Figure S2:** Dialysis platform. The NMR is connected to a PC for data acquisition and analysis via RMX.

Reaction solutions were transferred to a 10 mL gastight syringe and placed in the holder of the syringe pump. The syringe pump delivered the reagent solution to the flow reactor ( $V_{\text{reactor}} = 0.9 \text{ mL}$ ), which was placed in an isothermal oil bath ( $90^\circ\text{C}$ ). This reactor was illuminated with blue light (450 nm) for MMA. The outlet of the reactor was connected to a switch valve. (Figure S3) The stream out of the first reactor was sent to the dialysis loop, containing the inline NMR, dialysis block and peristaltic pump. The switch valve is activated when the loop is filled, and the dialysis loop runs independently with the peristaltic pump. After the dialysis is completed, the switch valve switches back, and the purified macroRAFT can be used in the second reactor. Fresh initiator and monomer are also added via another syringe pump.

|  |               |                                                                                                                                                                                                                                                                                                                                                 |
|--|---------------|-------------------------------------------------------------------------------------------------------------------------------------------------------------------------------------------------------------------------------------------------------------------------------------------------------------------------------------------------|
|  | <p>Step 1</p> | <p>First, homopolymers are made via RAFT polymerization. After that, the dialysis loop is filled with the reaction mixture. The dialysis loop is overfilled, and waste is sent to reactor two, which is cleaned in step 2.</p> <p><b>Pumps activated:</b> Syringe pump 1, peristaltic pump<br/> <b>Switch valve:</b> A<br/> <b>NMR:</b> off</p> |
|  | <p>Step 2</p> | <p>A dialysis loop is created. HPLC pump provides fresh solvent to the dialysis block. A syringe pump with solvent cleans the reactors.</p> <p><b>Pumps activated:</b> Syringe pump 2, peristaltic pump, HPLC pump<br/> <b>Switch valve:</b> B<br/> <b>NMR:</b> on</p>                                                                          |
|  | <p>Step 3</p> | <p>MacroRAFT purification is carried out. The reaction mixture is sent to the second reactor for block copolymerization.</p> <p><b>Pumps activated:</b> Syringe pump 2-3, peristaltic pump<br/> <b>Switch valve:</b> A<br/> <b>NMR:</b> off</p>                                                                                                 |

**Table S2:** Different steps in the dialysis setup

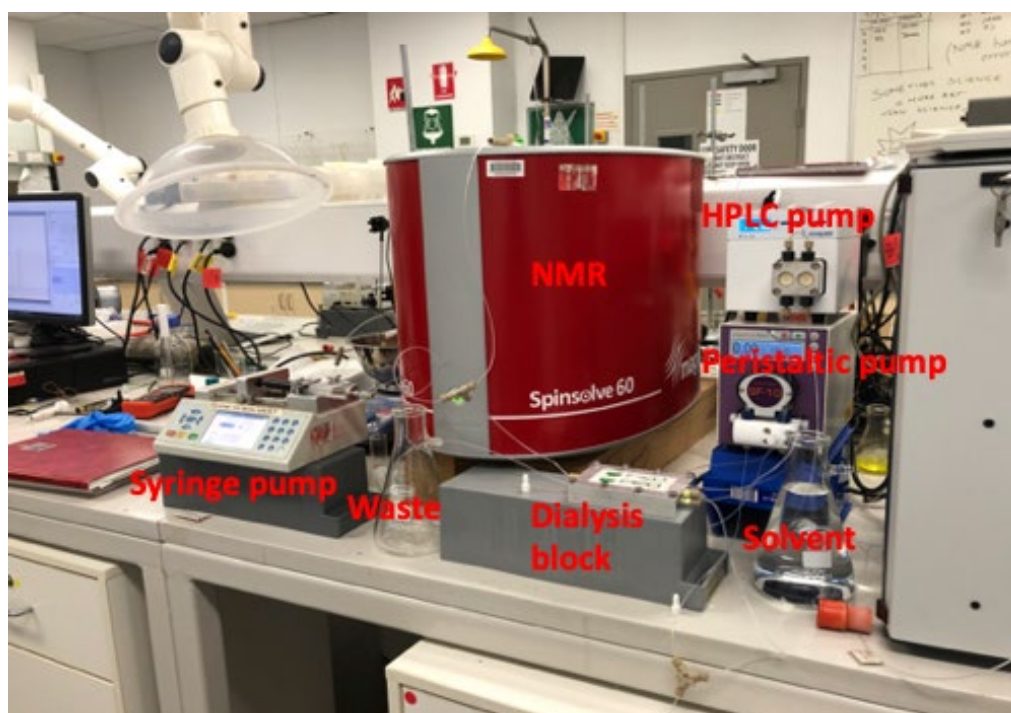

**Figure S3:** Dialysis platform in the lab

# Polymerization procedures

## Butyl acrylate (first block)

### Experimental procedure.

In a typical procedure, the RAFT-agent DoPAT (0.5 mmol, 1 eq.), the thermal initiator AIBN (0.05 mmol, 0.1 eq), butyl acrylate (40 mmol, 50 eq.) and the solvent 2-butanol (4.27 mL) were added in a glass vial. The different ratios [monomer]:[DoPAT] (DP) were 25, 50 and 75, and the concentration of AIBN was set to 0.1 eq. (See Table S3). The glass vial was sealed with a rubber septum, and the solution was purged with nitrogen (argon) for 20 minutes. Next, the reaction solution was transferred to a 10 mL gastight syringe, prepurged with argon (3x), and placed in the holder of the syringe pump. The flow reactor was manually flushed with 2-butanol before each new reaction. All reactions were performed at 90 °C.

| Butyl acrylate |           |        |         |          |        |             |           |     |
|----------------|-----------|--------|---------|----------|--------|-------------|-----------|-----|
| BA DP25        |           |        |         |          |        |             |           |     |
| class          | name      | M      | density | mass (g) | V (mL) | moles (mol) | Molar (M) | eq  |
| RAFT           | DoPAT     | 350.6  |         | 0.553    |        | 0.00158     | 0.158     | 1   |
| monomer        | BA        | 128.17 | 0.894   | 5.127    | 5.73   | 0.04000     | 4.000     | 25  |
| initiator      | AIBN      | 164.21 |         | 0.026    |        | 0.00016     | 0.0158    | 0.1 |
| solvent        | 2-butanol | 74.122 | 0.81    | 3.455    | 4.27   | 0.04661     | 4.661     | 29  |
| BA DP50        |           |        |         |          |        |             |           |     |
| class          | name      | M      | density | mass (g) | V (mL) | moles (mol) | Molar (M) | eq  |
| RAFT           | DoPAT     | 350.6  |         | 0.279    |        | 0.00080     | 0.080     | 1   |
| monomer        | BA        | 128.17 | 0.894   | 5.1268   | 5.73   | 0.04000     | 4.000     | 50  |
| initiator      | AIBN      | 164.21 |         | 0.013    |        | 0.00008     | 0.0079    | 0.1 |
| solvent        | 2-butanol | 74.122 | 0.81    | 3.455    | 4.27   | 0.04661     | 4.661     | 58  |
| BA DP75        |           |        |         |          |        |             |           |     |
| class          | name      | M      | density | mass (g) | V (mL) | moles (mol) | Molar (M) | eq  |
| RAFT           | DoPAT     | 350.6  |         | 0.186    |        | 0.00053     | 0.053     | 1   |
| monomer        | BA        | 128.17 | 0.894   | 5.1268   | 5.73   | 0.04000     | 4.000     | 75  |
| initiator      | AIBN      | 164.21 |         | 0.009    |        | 0.00005     | 0.0055    | 0.1 |
| solvent        | 2-butanol | 74.122 | 0.81    | 3.455    | 4.27   | 0.04661     | 4.661     | 87  |

**Table S3:** Reaction solutions for the first block with butyl acrylate

## Methyl methacrylate (first block)

### The tubular reactor setup

The reactor consists of PFA tubing (1/16" OD, 0.75 mm ID) wrapped around a glass framework and placed in an oil bath heated up to 90 °C on an IKA stirrer hot plate. The blue light LEDs connected with the programmable variable DC power supply unit are placed inside the glass framework. The intensity of blue light is measured using an optical power meter. (Model-

S401C, Pmax- 1W, Wave- 0.19-20  $\mu\text{m}$ , ThorLabs). Reactor volumes could easily be adapted by varying the length of the reactor tubing. Reaction solutions are pumped into the reactor via a Fusion 100 classic syringe pump, using 10 mL SGE gastight syringes flushed with N<sub>2</sub>. In a typical procedure, the monomer, photo-iniferter-agent, and solvent were added to a glass vial. The glass vial was sealed with a rubber septum, and the solution was purged with nitrogen (N<sub>2</sub>) for 5 minutes. Next, the reaction solution was transferred to a 10 mL gastight syringe (Trajan Scientific), preflushed with N<sub>2</sub>, and placed in the holder of the syringe pumps. For the photothermal iniferter polymerization, no need for any thermal initiator like AIBN. A 0.9 mL tubular reactor is employed for the polymerization at a temperature of 90 °C under illumination with blue light (450 nm).

### Experimental procedure.

The monomer MMA (3 M, 30 mmol, 3 g, 40 equiv.) and the photoRAFT agent CDP-TTC (0.75 mmol, 0.303 g, 1 equiv.) were dissolved in DMSO and passed N<sub>2</sub> for 5 min. The solution was then transferred to a gastight syringe and placed in the syringe pump holder. The photo flow reactor has a volume of 0.9ml and is kept at 90 °C under illumination with blue light (450 nm), controlled by the variable power supply unit. In photopolymerization, only the initiation step is photoinduced, and chain growth is still thermally initiated.

| Methyl methacrylate |         |   |         |          |          |             |           |     |
|---------------------|---------|---|---------|----------|----------|-------------|-----------|-----|
| MMA DP40            |         |   |         |          |          |             |           |     |
| class               | name    | M | density | mass (g) | V (mL)   | moles (mol) | Molar (M) | eq  |
| RAFT                | CDP-TTC |   | 403.67  | 0.303    |          | 0.00075     | 0.075     | 1   |
| monomer             | MMA     |   | 100.121 | 0.94     | 3        | 0.02996     | 2.996     | 40  |
| initiator           | /       | / | /       | /        | /        | /           | /         | /   |
| solvent             | DMSO    |   | 78.13   | 1.1      | 7.49     | 0.09586     | 9.586     | 128 |
| MMA DP50            |         |   |         |          |          |             |           |     |
| class               | name    | M | density | mass (g) | V (mL)   | moles (mol) | Molar (M) | eq  |
| RAFT                | CDP-TTC |   | 403.67  | 0.242    |          | 0.00060     | 0.060     | 1   |
| monomer             | MMA     |   | 100.121 | 0.94     | 3        | 0.02996     | 2.996     | 50  |
| initiator           | /       | / | /       | /        | /        | /           | /         | /   |
| solvent             | DMSO    |   | 78.13   | 1.1      | 7.489362 | 0.09586     | 9.586     | 160 |
| MMA DP75            |         |   |         |          |          |             |           |     |
| class               | name    | M | density | mass (g) | V (mL)   | moles (mol) | Molar (M) | eq  |
| RAFT                | CDP-TTC |   | 403.67  | 0.161    |          | 0.00040     | 0.040     | 1   |
| monomer             | MMA     |   | 100.121 | 0.94     | 3        | 0.02996     | 2.996     | 75  |
| initiator           | AIBN    | / | /       | /        | /        | /           | /         | /   |
| solvent             | DMSO    |   | 78.13   | 1.1      | 7.489362 | 0.09586     | 9.586     | 240 |

**Table S4:** Reaction solutions for the first block with methyl methacrylate

## Poly(ethylene glycol) methyl ether acrylate (second block)

The first step of doing a reaction is transforming the conventional mol/l that can be used in flasks or syringes to mol/min. The macroRAFT in the dialysis loop will be mixed with fresh monomer and initiator. Firstly, the residence time of the second reactor is determined. A residence time of 30 minutes was chosen. Because the reactor is 1.15 mL in volume, the total flow rate, consisting of the macroRAFT flow rate and the monomer flow rate, will be 0.038 mL/min. A calculation has to be made of how much every stream has to contribute to the total flow rate. In table S5 it is showed how the calculations are made. The ratio of the two flow rates is compared. The flow rate of the RAFT agent is kept at ratio 1, and the flow rate of the monomer is compared with the flow rate of the RAFT agent. Depending on the ratio, the calculation is as follows:

$$\begin{aligned} \text{Flowrate}_{\text{RAFT}} &= (\text{Flowrate}_{\text{Total}} / (\text{Ratio}_{\text{RAFT}} + \text{Ratio}_{\text{Monomer}})) \cdot \text{Ratio}_{\text{RAFT}} \\ \text{Flowrate}_{\text{Monomer}} &= (\text{Flowrate}_{\text{Total}} / (\text{Ratio}_{\text{RAFT}} + \text{Ratio}_{\text{Monomer}})) \cdot \text{Ratio}_{\text{Monomer}} \end{aligned}$$

Example (Ratio RAFT1:Monomer0.5):

$$\begin{aligned} \text{Flowrate}_{\text{RAFT}} &= ((0.038 \text{ mL/min}) / (1 + 0.5)) \cdot 1 = 0.0256 \text{ mL/min} \\ \text{Flowrate}_{\text{Monomer}} &= ((0.038 \text{ mL/min}) / (1 + 0.5)) \cdot 0.5 = 0.0128 \text{ mL/min} \end{aligned}$$

Depending on the concentration used in the preparation of the reaction solvents, the conversion of mL/min to mol/min. For the molarity of the first block, there is looked at the molarity of the RAFT agent. In this example, BA with a DP of 50 was used, which means that DOPAT has a molarity of 0.08 mol/L (0.00008 mol/mL). For the PEGMEA, a reaction mixture molarity of 2 mol/L (0.002 mol/mL) was chosen. This gives the following calculations:

$$\begin{aligned} \text{Mol/min}_{\text{RAFT}} &= \text{Flowrate}_{\text{RAFT}} \cdot \text{Molarity}_{\text{RAFT}} \\ \text{Mol/min}_{\text{Monomer}} &= \text{Flowrate}_{\text{Monomer}} \cdot \text{Molarity}_{\text{Monomer}} \end{aligned}$$

Example (Ratio RAFT1:Monomer0.5):

$$\text{Mol/min}_{\text{RAFT}} = (0.0256 \text{ mL/min}) \cdot (0.00008 \text{ mol/mL}) = 2.044 \cdot 10^{-6} \text{ mol/min}$$

$$\text{Mol/min}_{\text{Monomer}} = (0.0128 \text{ mL/min}) \cdot (0.002 \text{ mol/mL}) = 2.56 \cdot 10^{-5} \text{ mol/min}$$

The degree of polymerization (DP) can be determined for the different flow rate ratios. The mol/min of the two streams can be compared, and the DP can be found in this scenario via the following calculations:

$$DP_{\text{Ratio } x} = (\text{Mol/min}_{\text{Monomer}}) / (\text{Mol/min}_{\text{RAFT}})$$

Example (Ratio RAFT1:Monomer0.5):

$$DP_{0.5} = (2.56 \cdot 10^{-5} \text{ mol/min}) / (2.044 \cdot 10^{-6} \text{ mol/min}) = 12.5$$

This calculation can be performed for all the different ratios possible. These relationships between the ratio of the flow rates and the DP can be plotted, and a simple linear regression can be made. This relationship will be used to choose future DPs.

| Ratio | FR RAFT | FR monomer  | total FR    | mol/min RAFT | mol/min Monor | DP          |      |
|-------|---------|-------------|-------------|--------------|---------------|-------------|------|
| 1     | 0.5     | 0.025555556 | 0.012777778 | 0.038333     | 2.04444E-06   | 0.000025556 | 12.5 |
| 1     | 0.6     | 0.023958333 | 0.014375    | 0.038333     | 1.91667E-06   | 0.000028750 | 15   |
| 1     | 0.7     | 0.02254902  | 0.015784314 | 0.038333     | 1.80392E-06   | 0.000031569 | 17.5 |
| 1     | 0.8     | 0.021296296 | 0.017037037 | 0.038333     | 1.7037E-06    | 0.000034074 | 20   |
| 1     | 0.9     | 0.020175439 | 0.018157895 | 0.038333     | 1.61404E-06   | 0.000036316 | 22.5 |
| 1     | 1       | 0.019166667 | 0.019166667 | 0.038333     | 1.53333E-06   | 0.000038333 | 25   |
| 1     | 1.1     | 0.018253968 | 0.020079365 | 0.038333     | 1.46032E-06   | 0.000040159 | 27.5 |
| 1     | 1.2     | 0.017424242 | 0.020909091 | 0.038333     | 1.39394E-06   | 0.000041818 | 30   |
| 1     | 1.3     | 0.016666667 | 0.021666667 | 0.038333     | 1.33333E-06   | 0.000043333 | 32.5 |
| 1     | 1.4     | 0.015972222 | 0.022361111 | 0.038333     | 1.27778E-06   | 0.000044722 | 35   |
| 1     | 1.5     | 0.015333333 | 0.023       | 0.038333     | 1.22667E-06   | 0.000046000 | 37.5 |
| 1     | 1.6     | 0.01474359  | 0.023589744 | 0.038333     | 1.17949E-06   | 0.000047179 | 40   |
| 1     | 1.7     | 0.014197531 | 0.024135802 | 0.038333     | 1.1358E-06    | 0.000048272 | 42.5 |
| 1     | 1.8     | 0.013690476 | 0.024642857 | 0.038333     | 1.09524E-06   | 0.000049286 | 45   |
| 1     | 1.9     | 0.013218391 | 0.025114943 | 0.038333     | 1.05747E-06   | 0.000050230 | 47.5 |
| 1     | 2       | 0.012777778 | 0.025555556 | 0.038333     | 1.02222E-06   | 0.000051111 | 50   |
| 1     | 2.1     | 0.012365591 | 0.025967742 | 0.038333     | 9.89247E-07   | 0.000051935 | 52.5 |
| 1     | 2.2     | 0.011979167 | 0.026354167 | 0.038333     | 9.58333E-07   | 0.000052708 | 55   |
| 1     | 2.3     | 0.011616162 | 0.026717172 | 0.038333     | 9.29293E-07   | 0.000053434 | 57.5 |
| 1     | 2.4     | 0.01127451  | 0.027058824 | 0.038333     | 9.01961E-07   | 0.000054118 | 60   |
| 1     | 2.5     | 0.010952381 | 0.027380952 | 0.038333     | 8.7619E-07    | 0.000054762 | 62.5 |

**Table S5:** Relationships ratio flowrates with DP for the second block. (BA DP50 first block)

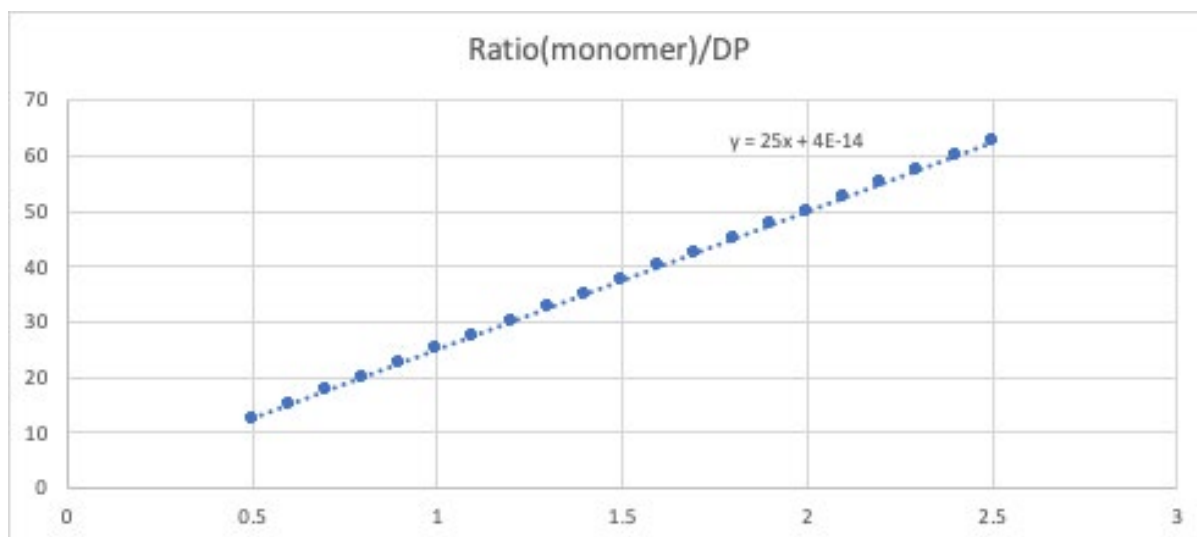

**Figure S6:** Relationships ratio flowrates with DP (BA DP50 first block)

Now we target specific flow rates for specific DP of the second block. The block copolymer (BA50-PEGMEA45) will be taken as an example. The relationship between the DP of the second block and the ratio for BA DP50 as the first block can be seen in figure S5. The calculation is as follows:

$$DP = 25 \cdot Ratio_{Monomer} + 4 \cdot 10^{-14}$$

Example (BA50-PEGMEA45):

$$Ratio_{monomer} = (DP - 4 \cdot 10^{-14})/25 = (45 - 4 \cdot 10^{-14})/25 = 1.8$$

With this ratio, we can find the flow rates we have to put on the peristaltic pump (RAFT flow rate) and the syringe pump (monomer flow rate). The calculation for DP45 for the second:

$$Flowrate_{RAFT} = (Flowrate_{Total}/(Ratio_{RAFT} + Ratio_{Monomer})) \cdot Ratio_{RAFT}$$

$$Flowrate_{Monomer} = (Flowrate_{Total}/(Ratio_{RAFT} + Ratio_{Monomer})) \cdot Ratio_{Monomer}$$

Example (BA50-PEGMEA45):

$$Flowrate_{RAFT} = ((0.038 \text{ mL/min})/(1 + 1.8)) \cdot 1 = 0.0137 \text{ mL/min}$$

$$Flowrate_{Monomer} = ((0.038 \text{ mL/min})/(1 + 1.8)) \cdot 1.8 = 0.0246 \text{ mL/min}$$

| <b>Poly(ethylene glycol) methyl ether acrylate</b> |             |          |                |                 |               |                    |                  |           |
|----------------------------------------------------|-------------|----------|----------------|-----------------|---------------|--------------------|------------------|-----------|
| <b>PEGMEMMA DP25-50-75</b>                         |             |          |                |                 |               |                    |                  |           |
| <b>class</b>                                       | <b>name</b> | <b>M</b> | <b>density</b> | <b>mass (g)</b> | <b>V (mL)</b> | <b>moles (mol)</b> | <b>Molar (M)</b> | <b>eq</b> |
| RAFT                                               | /           | /        | /              | /               | /             | /                  | /                | /         |
| monomer                                            | PEGMEA      | 480      | 1.08           | 2               | 1.85          | 0.00417            | 2.000            | 25        |
| initiator                                          | AIBN        | 164.21   |                | 0.003           |               | 0.00002            | 0.0091           | 0.1       |
| solvent                                            | 2-butanol   | 74.122   | 0.81           | 0.12            | 0.15          | 0.00162            | 0.809            | 10        |

**Table S6:** Reaction solutions for the second block with PEGMEA



# Block copolymer analysis

| Name            | Conversion NMR (%) | <i>Mn</i> NMR (g/mol) | <i>Mn</i> GPC (g/mol) | Dispersity GPC | DLS Intensity (nm) | DLS Volume (nm) | DLS Number (nm) |
|-----------------|--------------------|-----------------------|-----------------------|----------------|--------------------|-----------------|-----------------|
| BA 60           | 87                 | 6890                  | 4100                  | 1.177          | /                  | /               | /               |
| BA 80           | 82                 | 9066                  | 5300                  | 1.18           | /                  | /               | /               |
| BA 100          | 90                 | 11240                 | 7160                  | 1.13           | /                  | /               | /               |
| BA60 – PEGMA25  | 16                 | 8800                  | 7660                  | 1.482          | 34                 | 18              | 24              |
| BA60 – PEGMA45  | 17                 | 10560                 | 9570                  | 1.559          | 70                 | 6               | 64              |
| BA60 – PEGMA65  | 16                 | 11880                 | 13230                 | 1.638          | 134                | 14              | 15              |
| BA80 – PEGMA25  | 30                 | 12670                 | 8280                  | 1.471          | 49                 | 27              | 34              |
| BA80 – PEGMA45  | 30                 | 15550                 | 12000                 | 1.553          | 78                 | 22              | 32              |
| BA80 – PEGMA65  | 33                 | 19360                 | 13740                 | 1.564          | 144                | 15              | 17              |
| BA100 – PEGMA25 | 45                 | 16650                 | 8200                  | 1.499          | 90                 | 50              | 64              |
| BA100 – PEGMA45 | 73                 | 27000                 | 10970                 | 1.575          | 154                | 64              | 64              |
| BA100 – PEGMA65 | 73                 | 34330                 | 12200                 | 1.653          | 188                | 14              | 15              |

**Table S7:** NMR and SEC results for BA block copolymers

| Name            | Conversion NMR (%) | <i>Mn</i> NMR (g/mol) | <i>Mn</i> GPC (g/mol) | Dispersity GPC | DLS Intensity (nm) |
|-----------------|--------------------|-----------------------|-----------------------|----------------|--------------------|
| MMA 25          | 89                 | 2580                  | 2660                  | 1.162          | /                  |
| MMA 50          | 90                 | 4860                  | 3920                  | 1.162          | /                  |
| MMA 75          | 88                 | 6607                  | 5750                  | 1.032          | /                  |
| MMA25 – PEGMA25 | 78                 | 11940                 | 9750                  | 1.268          | 26                 |
| MMA25 – PEGMA45 | 71                 | 17900                 | 14000                 | 1.451          | 23                 |
| MMA25 – PEGMA65 | 65                 | 22860                 | 18560                 | 1.759          | 25                 |
| MMA50 – PEGMA25 | 82                 | 14700                 | 11090                 | 1.601          | 24                 |
| MMA50 – PEGMA45 | 78                 | 21700                 | 16000                 | 1.742          | 36                 |
| MMA50 – PEGMA65 | 90                 | 32940                 | 21730                 | 1.792          | 28                 |
| MMA75 – PEGMA25 | 88                 | 16160                 | 17870                 | 1.624          | 42                 |
| MMA75 – PEGMA45 | 72                 | 21150                 | 28530                 | 1.787          | 37                 |
| MMA75 – PEGMA65 | 91                 | 34000                 | 33040                 | 2.008          | 36                 |

**Table S8:** NMR and SEC results for MMA block copolymers

# End-group analysis

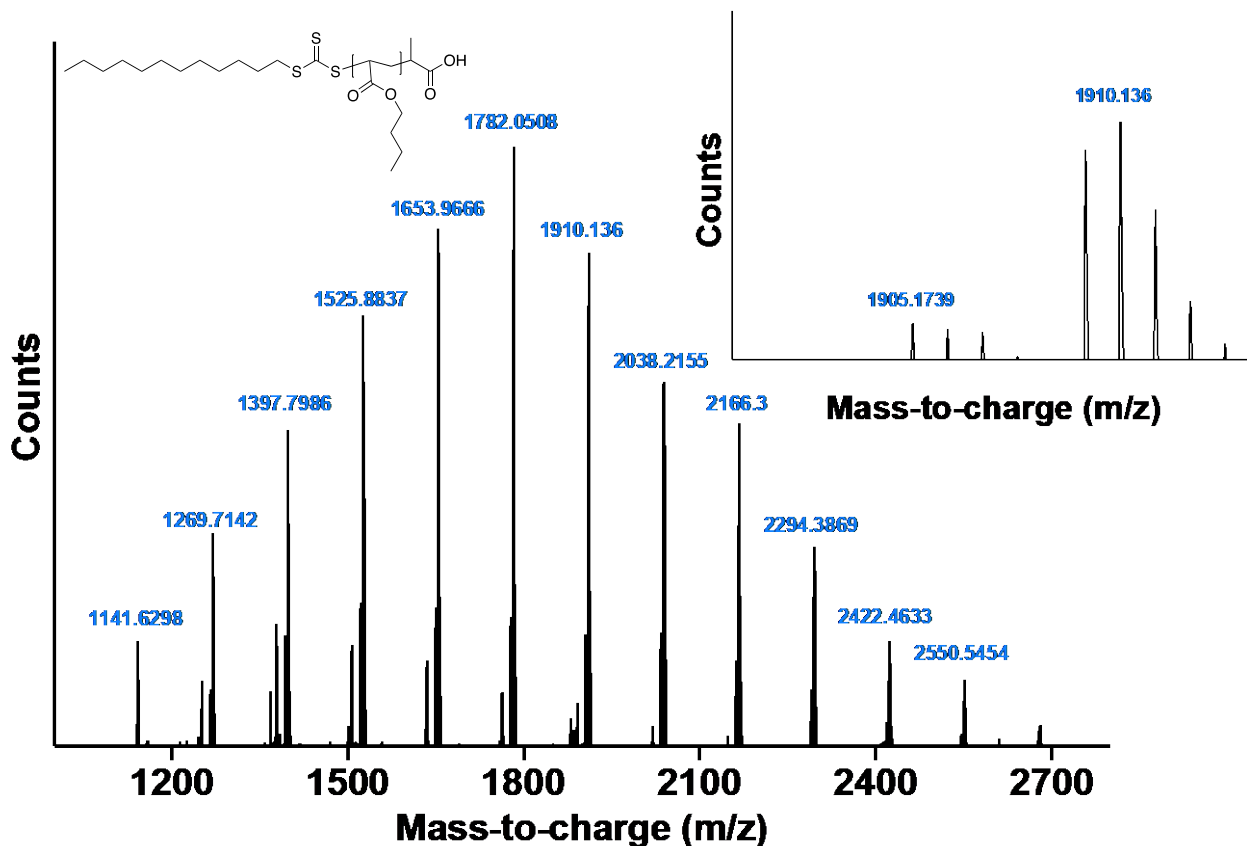

**Figure S4:** Example ESI spectra of poly(butyl acrylate) with a targeted molecular weight of 2000 g/mol. Structure of the RAFT polymer is shown in the insert. The expansion of one repeat unit shows a major and a minor distribution. The major distribution is assigned to the expected RAFT polymer, while the small sub distribution stems from AIBN-initiated trithiocarbonate-capped pBA (see Table S9).

End-group analysis was performed via Electrospray Ionization (ESI). The same procedure was followed as previously described for the homopolymerization of butyl acrylate. The targeted degree of polymerization was 13. The dialysis block could not be used due to the pore size of 3.5 kDa. To mimic the setup, the polymer mixture was pumped in the dialysis loop, and the dialysis block was replaced by a union (IDEX-P-702). After 3 hours, the polymer was dried under a gentle nitrogen flow. The results can be found in table S8. All the expected peaks can be found, which confirms the presence of the end group on the polymers.

| Chemical Species                               | Theoretical Mass (Da) | Exact Mass (Da) | $\Delta$ (m/z) |
|------------------------------------------------|-----------------------|-----------------|----------------|
| DOPAT-BA-DP6, Na <sup>+</sup>                  | 1141.6324             | 1141.6298       | 0.0026         |
| DOPAT-BA-DP7, Na <sup>+</sup>                  | 1269.7161             | 1269.7142       | 0.0019         |
| DOPAT-BA-DP8, Na <sup>+</sup>                  | 1397.7999             | 1397.7986       | 0.0013         |
| DOPAT-BA-DP9, Na <sup>+</sup>                  | 1525.8836             | 1525.8837       | 0.0001         |
| DOPAT-BA-DP10, Na <sup>+</sup>                 | 1653.9673             | 1653.9666       | 0.0007         |
| DOPAT-BA-DP11, Na <sup>+</sup>                 | 1782.051              | 1782.0508       | 0.0002         |
| DOPAT-BA-DP12, Na <sup>+</sup>                 | 1910.1347             | 1910.136        | 0.0013         |
| DOPAT-BA-DP13, Na <sup>+</sup>                 | 2038.2184             | 2038.2155       | 0.0029         |
| DOPAT-BA-DP14, Na <sup>+</sup>                 | 2166.3021             | 2166.3          | 0.0021         |
| DOPAT-BA-DP12, AIBN-initiated, Na <sup>+</sup> | 1905.156              | 1905.1739       | 0.022          |

**Table S9:** Theoretical and exact mass of different DPs of the ideal pBA RAFT polymer as shown in Figure S4. The last entry shows that the small subdistribution seen is attributable to AIBN-initiated RAFT polymer

# Dialysis setup- kinetics

The dialysis rate depends on the concentration gradient over the membrane and the design of the dialysis setup used. Every design has a specific dialysis coefficient. This indicates the rate of the dialysis in the system. The dialysis coefficient of the system is obtained experimentally. A flow rate of 0.2 ml/min was used during the dialysis procedure. The residence time is 900 seconds, knowing that the volume of the one complete flow channel in the block is 3 mL. Every time the polymer mixture completed a loop, the clearance of the monomer could be calculated via inline NMR and end-group analysis. This gave the following results:

|        | BA60          |                | BA80          |                | BA100         |                |
|--------|---------------|----------------|---------------|----------------|---------------|----------------|
| #Loops | Clearance (%) | Difference (%) | Clearance (%) | Difference (%) | Clearance (%) | Difference (%) |
| 1      | 38            |                | 37            |                | 35            |                |
| 2      | 62            | 24             | 60            | 23             | 57            | 22             |
| 3      | 77            | 15             | 76            | 16             | 73            | 16             |
| 4      | 85            | 8              | 86            | 10             | 84            | 11             |
| 5      | 91            | 6              | 91            | 5              | 91            | 7              |
| 6      | 95            | 4              | 95            | 4              | 95            | 4              |
|        | MMA45         |                | MMA50         |                | MMA75         |                |
| #Loops | Clearance (%) | Difference (%) | Clearance (%) | Difference (%) | Clearance (%) | Difference (%) |
| 1      | 36            |                | 38            |                | 39            |                |
| 2      | 59            | 23             | 59            | 21             | 63            | 24             |
| 3      | 74            | 15             | 73            | 14             | 78            | 15             |
| 4      | 85            | 11             | 83            | 10             | 88            | 10             |
| 5      | 91            | 6              | 90            | 7              | 93            | 5              |
| 6      | 95            | 4              | 94            | 4              | 96            | 3              |

**Table S10:** Clearance values of monomers BA and MMA obtained via inline NMR.

In the calculation for the dialysis coefficient, BA60 is used as an example. The clearance after one loop for the BA polymer is 38%. This conversion of the homopolymer was 87%. In a

reaction that started with 4M monomer, only 0.52M monomer is left in the polymer mixture at the beginning of the dialysis. After one loop, 38% of 0.52M or 0.1976M monomer is cleared out of the solution. Now we have all the data to fill in the following equation:

$$\frac{dc_I}{dt} = -kc_I$$

$$\frac{-0.1976 M}{900 s} = -k \cdot 0.52M$$

$$k = \frac{0.1976 M}{900 s \cdot 0.52M} = 4.22 \cdot 10^{-4} s^{-1}$$

Now that we have obtained the k value for the dialysis of this reaction, the rest of the NMR clearance values are checked against this k value. This is done to prove that dialysis solely depends on the polymer mixture's concentration and that the dialysis is always in its optimal range. An example is given for loop 2 for the BA60 polymer. After loop 1, a concentration of 0.3224M (0.52M-0.1976M) monomer is observed. After loop 2, the system obtained a total clearance of 62%. This means that 24% or 0.1248 M monomer is cleared. This is the experimental data. Now we can test this experimental data with the obtained k value.

$$\frac{dc_I}{dt} = -kc_I$$

$$\frac{dc_I}{900 s} = -4.22 \cdot 10^{-4} s^{-1} \cdot 0.3224M$$

$$dc_I = -4.22 \cdot 10^{-4} s^{-1} \cdot 0.3224M \cdot 900 s = 0.122 M$$

If we calculate the clearance after the second loop theoretically, a clearance of 0.122 M is found) For NMR, we expect an error margin of 5% so that this value can be equalled to the value of 0.1248 M obtained via experimental work. This confirms that this setup only depends on the initial monomer concentration and that the concentration gradient is always optimal. The total clearance, calculated theoretically, of the setup is 62%. ((0.1976+0.122)/0.52). This is close to the 62% clearance of the NMR calculation. After every loop, the same calculation is done. All the calculations for BA60 can be found in table S11. The data from the other polymer systems can be found in figure S4.

| #Loops | Clearance (%) | Difference (%) | Theoretical (%) |
|--------|---------------|----------------|-----------------|
| 1      | 38            |                | 38              |
| 2      | 62            | 24             | 62              |
| 3      | 77            | 15             | 76              |
| 4      | 85            | 8              | 85              |
| 5      | 91            | 6              | 91              |
| 6      | 95            | 4              | 94              |

**Table S11:** Clearance in BA60 system obtained via inline NMR and calculations based on Eq. 3.

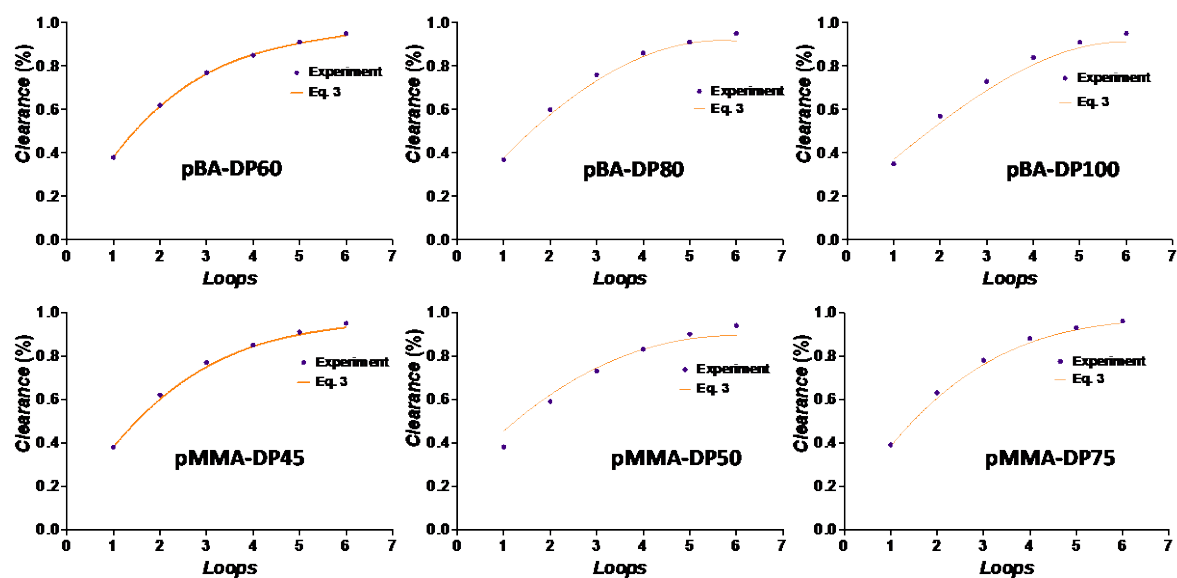

**Figure S4:** Comparison of theoretical and experimental clearance data of all the polymer systems.

## References

1. Ferguson, C.J., et al., *Ab Initio Emulsion Polymerization by RAFT-Controlled Self-Assembly*. *Macromolecules*, 2005. **38**(6): p. 2191-2204.
